# Supplementary material for: Natural Occurrence of Regulated and Emerging Mycotoxins in Wheat Grains and Assessment of the Risks from Dietary Mycotoxins Exposure in China
Source: MDPI journal article supplement (doi:10.3390/toxins15060389), 2023-06-09
Supplement: s1 [file s1]

## Supplementary Materials

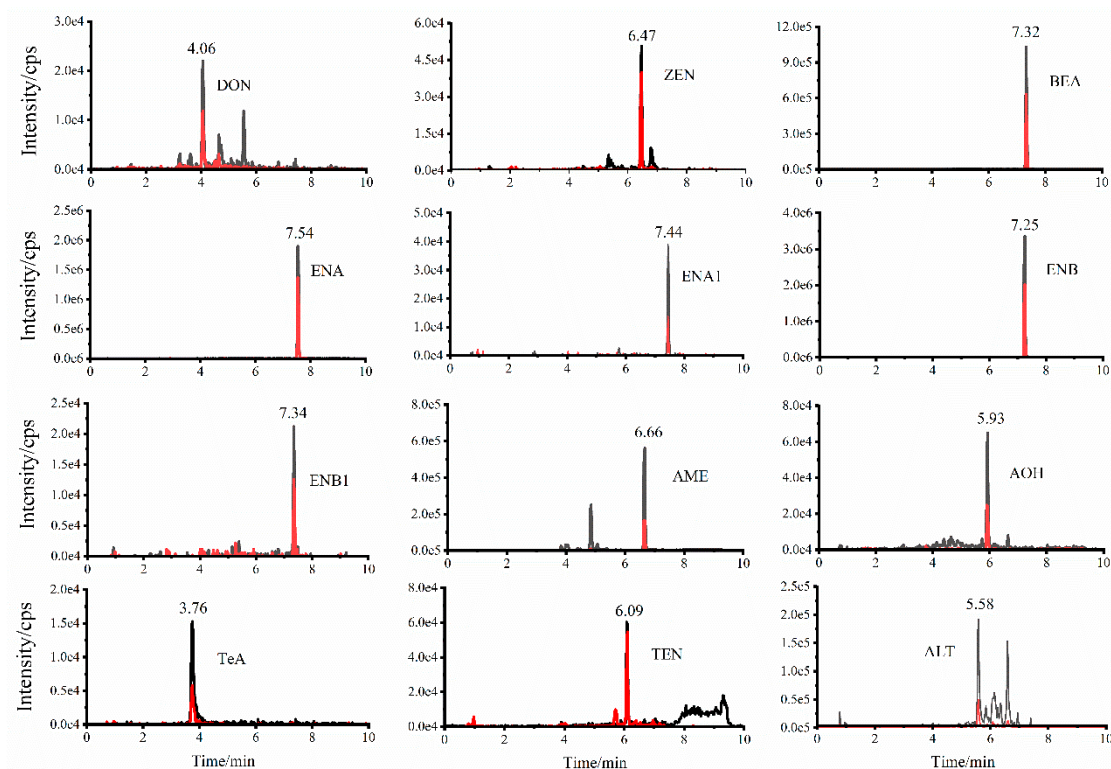

**Figure S1.** The LC-MS/MS chromatogram of mycotoxins DON, ZEA, BEA, ENA, ENA1, ENB, ENB1, AME, AOH, TeA, TEN, and ALT in the wheat grain matrix. The concentration level of DON is 50 µg/kg; the concentration level for both of TeA and ALT is 10 µg/kg; the remaining mycotoxins are at 5 µg/kg.

**Table S1.** The LC-MS/MS acquisition parameters for the 12 mycotoxins.

| Mycotoxin | Precursor ion (m/z) | Product ions (m/z) | Declustering potential (V) | Collision energy (eV) |
|-----------|---------------------|--------------------|----------------------------|-----------------------|
| DON       | 295.1               | 265.1*             | -32                        | -15                   |
|           |                     | 138.1              | -32                        | -23                   |
| ZEN       | 317.2               | 175.0*             | -153                       | -32                   |
|           |                     | 131.0              | -153                       | -39                   |
| BEA       | 801.3               | 784.5*             | 50                         | 23                    |
|           |                     | 243.9              | 50                         | 39                    |
| ENA       | 699.4               | 682.3*             | 40                         | 24                    |
|           |                     | 210.1              | 40                         | 38                    |
| ENA1      | 668.6               | 210.2*             | 125                        | 29                    |
|           |                     | 541.2              | 125                        | 30                    |
| ENB       | 657.4               | 640.3*             | 40                         | 24                    |
|           |                     | 196.1              | 40                         | 40                    |
| ENB1      | 654.7               | 196.2*             | 100                        | 36                    |
|           |                     | 210.2              | 100                        | 30                    |
| AME       | 271.2               | 256.2*             | -100                       | -28                   |

|                                     |       |        |      |     |
|-------------------------------------|-------|--------|------|-----|
|                                     |       | 228.2  | -100 | -42 |
| AOH                                 | 257.0 | 213.2* | -120 | -32 |
|                                     |       | 147.2  | -120 | -42 |
| TeA                                 | 196.0 | 139.0* | -50  | -28 |
|                                     |       | 112.0  | -50  | -40 |
| TEN                                 | 413.3 | 140.8* | -126 | -27 |
|                                     |       | 271.1  | -126 | -23 |
| ALT                                 | 293.0 | 257.0* | 57   | 19  |
|                                     |       | 229.0  | 57   | 30  |
| <sup>13</sup> C <sub>15</sub> -DON  | 310.1 | 278.9  | -31  | -16 |
| <sup>13</sup> C <sub>18</sub> -ZEN  | 334.9 | 140.2  | -78  | -38 |
| <sup>13</sup> C <sub>45</sub> -BEA  | 846.5 | 829.6  | 80   | 29  |
| <sup>13</sup> C <sub>36</sub> -ENA  | 735.7 | 718.6  | 96   | 29  |
| <sup>13</sup> C <sub>35</sub> -ENA1 | 720.7 | 703.5  | 74   | 26  |
| <sup>13</sup> C <sub>33</sub> -ENB  | 690.7 | 673.5  | 99   | 26  |
| <sup>13</sup> C <sub>34</sub> -ENB1 | 705.7 | 688.6  | 86   | 27  |
| <sup>13</sup> C <sub>15</sub> -AME  | 286.2 | 270.1  | -114 | -29 |
| <sup>13</sup> C <sub>14</sub> -AOH  | 271.1 | 227.0  | -140 | -37 |
| <sup>13</sup> C <sub>10</sub> -TeA  | 206.1 | 145.1  | -95  | -26 |
| <sup>13</sup> C <sub>22</sub> -TEN  | 435.1 | 147.1  | -130 | -26 |
| <sup>13</sup> C <sub>15</sub> -ALT  | 306   | 213.7  | 95   | 34  |

\* Quantification ion transition.
